# Supplementary material for: Complement Regulatory Proteins are Associated with Progression Rate of Geographic Atrophy Secondary to Age-related Macular Degeneration
Source: Research Square preprint supplement (doi:10.21203/rs.3.rs-8398973/v1), 2026-01-01
Supplement: Supplementary file 1 [file d4436a0c3b61dac96aa538d9.docx]

**Supplementary Table 1**

| **Target** | CD4 | CD8 | CD14 | CD16 | CD35 | CD59 |
| --- | --- | --- | --- | --- | --- | --- |
| Flourochrome | PerCP | Brilliant Violet 510 | Pacific Blue | APC/Cy7 | APC | FITC |
| Isotype | IgG2a | IgG1 | IgG1 | IgG1 | IgG1 | IgG2a |
| Manufacturer | R&D Systems | BioLegend | BioLegend | BioLegend | R&D Systems | BioLegend |
| Cat. No. | FAB3791C | 301048 | 325616 | 302018 | FAB5748A | 304706 |
| **Negative isotype** |  |  |  |  |  |  |
| Flourochrome |  |  |  |  | APC | FITC |
| Isotype |  |  |  |  | IgG1 | IgG2a |
| Manufacturer |  |  |  |  | BioLegend | BioLegend |
| Cat. No. |  |  |  |  | 400122 | 400210 |

**Supplementary Table 2**

|  | **CFH rs1061170** |  | **P value** |  |
| --- | --- | --- | --- | --- |
|  | **CC,CT genotype** | **TT genotype** | **CC,CT vs TT genotype** | |
| ***GA, No. (%)*** | **n=69 (81)** | **n=16 (19)** |  |  |
| CD35+ CD4+ | 1.47 (1.53) | 1.22 (0.52) | 0.525† |  |
| CD35+ CD8+ | 1.63 (1.46) | 2.08 (1.31) | 0.142† |  |
| CD59+ CD4+ | 96.0 (5.67) | 96.7 (2.90) | 0.218† |  |
| CD59+ CD8+ | 44.1 (36.2) | 48.0 (34.9) | 0.337* |  |

**Supplementary Table 3**

|  | **ARMS2 rs10490924** |  | **P value** |  |
| --- | --- | --- | --- | --- |
|  | **TT,TG genotype** | **GG genotype** | **TT,TG vs GG genotype** | |
| ***GA, No. (%)*** | **n=55 (65)** | **n=30 (35)** |  |  |
| Classical CD35+ | 2.87 (2.45) | 2.44 (1.09) | 0.390† |  |
| Intermediate CD35+ | 9.35 (17.1) | 7.74 (19.6) | 0.952† |  |
| Non-classical CD35+ | 1.16 (2.15) | 0.60 (1.52) | 0.453† |  |
| Classical CD59+ | 5.48 (2.97) | 5.71 (2.77) | 0.927* |  |
| Intermediate CD59+ | 3.67 (3.58) | 2.92 (2.94) | 0.462† |  |
| Non-classical CD59+ | 8.08 (3.57) | 9.32 (4.45) | 0.082† |  |
| CD35+ CD4+ | 1.38 (1.33) | 1.09 (1.22) | 0.209† |  |
| CD35+ CD8+ | 1.95 (1.80) | 1.56 (1.33) | 0.133† |  |
| CD59+ CD4+ | 96.2 (5.95) | 96.5 (4.93) | 0.751† |  |
| CD59+ CD8+ | 40.7 (36.2) | 47.0 (35.1) | 0.636† |  |
